# Supplementary material
Source: PubMed Central journal article supplement (PMC7613253)
Supplement: EMS151233-supplement-Supplementary_Material.pdf [file EMS151233-supplement-Supplementary_Material.pdf]

Supplementary Table 1. Demographic data of the ‘healthy’ and ‘unhealthy’ population

|                                               | <b>Healthy</b> | <b>Unhealthy</b> | <b>p</b>   |
|-----------------------------------------------|----------------|------------------|------------|
|                                               | <b>n=742</b>   | <b>n=3593</b>    | <b>...</b> |
| Weekly consumed standard units of alcohol     | 10.6±10.5      | 13.2±13.5        | <0.001     |
| Age, years                                    | 59.1±7.0       | 62.0±7.6         | <0.001     |
| Sex (male)                                    | 47.0%          | 47.8%            | 0.749      |
| Cholesterol                                   | 5.7±1.0        | 5.7±1.1          | 0.987      |
| Body mass index (kg/m <sup>2</sup> )          | 24.4±2.8       | 27.0±4.3         | <0.001     |
| Seven-day average acceleration, milli-gravity | 3.3±0.4        | 3.2±0.5          | <0.001     |
| Townsend deprivation index                    | -2.1±2.6       | -2.0±2.7         | 0.243      |

Continuous variables are reported as mean ± standard deviation, whereas categorical variables as frequencies and percentages.

Supplementary Table 2. Association between CMR parameters and alcohol consumption in the 'healthy' and 'unhealthy' population

|                        | Average value | Unadjusted             |                | Adjusted           |              |
|------------------------|---------------|------------------------|----------------|--------------------|--------------|
|                        | Mean±SD       | β (95% CI)             | p              | β (95% CI)         | p            |
| LVEDV (ml)             |               |                        |                |                    |              |
| Healthy                | 144.4±34.7    | 0.75 (0.52-0.99)       | < <b>0.001</b> | 0.22 (0.03-0.41)   | 0.024        |
| Unhealthy              | 144.2±34.2    | 0.53 (0.45-0.61)       | < <b>0.001</b> | 0.11 (0.04-0.19)   | <b>0.002</b> |
| LVESV (ml)             |               |                        |                |                    |              |
| Healthy                | 59.0±18.2     | 0.32 (0.20-0.45)       | < <b>0.001</b> | 0.06 (-0.04-0.17)  | 0.242        |
| Unhealthy              | 59.2±20.5     | 0.26 (0.21-0.31)       | < <b>0.001</b> | 0.05 (0.00-0.10)   | 0.035        |
| LVSV (ml)              |               |                        |                |                    |              |
| Healthy                | 85.5±20.6     | 0.43 (0.29-0.57)       | < <b>0.001</b> | 0.16 (0.04-0.28)   | 0.011        |
| Unhealthy              | 85.0±19.2     | 0.27 (0.22-0.32)       | < <b>0.001</b> | 0.06 (0.02-0.11)   | <b>0.004</b> |
| LVEF (%)               |               |                        |                |                    |              |
| Healthy                | 59.5±5.8      | -0.02 (-0.06-0.02)     | 0.417          | 0.01 (-0.03-0.05)  | 0.508        |
| Unhealthy              | 59.4±6.5      | -0.03 (-0.05 to -0.01) | < <b>0.001</b> | 0.00 (-0.02-0.02)  | 0.826        |
| LVM (g)                |               |                        |                |                    |              |
| Healthy                | 85.8±24.0     | 0.53 (0.37-0.69)       | < <b>0.001</b> | 0.11 (-0.01-0.23)  | 0.068        |
| Unhealthy              | 90.4±24.8     | 0.43 (0.37-0.49)       | < <b>0.001</b> | 0.06 (0.02-0.11)   | 0.009        |
| RVEDV (ml)             |               |                        |                |                    |              |
| Healthy                | 155.1±40.8    | 0.86 (0.59-1.14)       | < <b>0.001</b> | 0.18 (-0.03-0.40)  | 0.085        |
| Unhealthy              | 152.6±36.8    | 0.59 (0.50-0.68)       | < <b>0.001</b> | 0.10 (0.02-0.17)   | 0.010        |
| RVESV (ml)             |               |                        |                |                    |              |
| Healthy                | 69.4±24.3     | 0.42 (0.25-0.58)       | < <b>0.001</b> | 0.04 (-0.09-0.17)  | 0.548        |
| Unhealthy              | 67.3±22.1     | 0.31 (0.25-0.36)       | < <b>0.001</b> | 0.03 (-0.02-0.08)  | 0.205        |
| RVSV (ml)              |               |                        |                |                    |              |
| Healthy                | 85.7±20.5     | 0.44 (0.30-0.58)       | < <b>0.001</b> | 0.15 (0.03-0.26)   | 0.015        |
| Unhealthy              | 85.3±19.2     | 0.28 (0.23-0.33)       | < <b>0.001</b> | 0.07 (0.02-0.11)   | <b>0.002</b> |
| RVEF (%)               |               |                        |                |                    |              |
| Healthy                | 55.9±6.3      | -0.02 (-0.06-0.02)     | 0.363          | 0.03 (-0.01-0.07)  | 0.196        |
| Unhealthy              | 56.5±6.5      | -0.03 (-0.05 to -0.01) | < <b>0.001</b> | 0.01 (-0.01-0.03)  | 0.228        |
| LA maximal volume (ml) |               |                        |                |                    |              |
| Healthy                | 74.6±23.5     | 0.29 (0.13-0.46)       | < <b>0.001</b> | 0.15 (-0.01-0.32)  | 0.071        |
| Unhealthy              | 74.1±25.1     | 0.18 (0.12-0.24)       | < <b>0.001</b> | 0.10 (0.03-0.16)   | <b>0.004</b> |
| LA EF (%)              |               |                        |                |                    |              |
| Healthy                | 61.1±8.0      | 0.00 (-0.06-0.05)      | 0.872          | 0.00 (-0.06-0.06)  | 0.062        |
| Unhealthy              | 59.9±9.7      | -0.03 (-0.06 to -0.01) | <b>0.005</b>   | -0.01 (-0.04-0.01) | 0.015        |
| RA maximal volume (ml) |               |                        |                |                    |              |
| Healthy                | 81.3±26.4     | 0.36 (0.17-0.54)       | < <b>0.001</b> | 0.06 (-0.11-0.23)  | 0.496        |
| Unhealthy              | 79.2±26.5     | 0.30 (0.23-0.36)       | < <b>0.001</b> | 0.06 (-0.01-0.12)  | 0.080        |
| RA EF (%)              |               |                        |                |                    |              |
| Healthy                | 43.7±9.5      | -0.10 (-0.17 to -0.04) | <b>0.003</b>   | -0.04 (-0.11-0.03) | 0.228        |
| Unhealthy              | 42.1±10.9     | -0.08 (-0.10 to -0.05) | < <b>0.001</b> | -0.02 (-0.05-0.01) | 0.220        |

Adjustment was made for age, ethnicity, body mass index, smoking, hypertension, diabetes mellitus, physical activity, Townsend deprivation index and cholesterol level.

CI=Confidence interval; EF=Ejection fraction; LA=Left atrium; LVEDV=Left ventricular end-diastolic volume; LVEF=Left ventricular ejection fraction; LVESV=Left ventricular end-systolic volume; LSV=Left ventricular stroke volume; RA=Right atrium; RVEDV=Right ventricular end-diastolic volume; RVEF=Right ventricular ejection fraction; RVESV=Right ventricular end-systolic volume; RSV=Right ventricular stroke volume; SV=Stroke volume.
